# Supplementary material for: Tumor Compactness based on CT to predict prognosis after multimodal treatment for esophageal squamous cell carcinoma
Source: PubMed Central journal article supplement (PMC6642095; doi:10.1038/s41598-019-46899-x), 2019-07-19
Supplement: 41598_2019_46899_MOESM1_ESM.pdf [file 41598_2019_46899_MOESM1_ESM.pdf]

1 **Tumor Compactness based on CT to predict prognosis after multimodal treatment for**  
2 **esophageal squamous cell carcinoma**

3 **Running title:** CT-based tumor compactness and ESCC prognosis

4 Qifeng Wang<sup>1,\*</sup>, MD, Bangrong Cao<sup>1,\*</sup>, PhD, Junqiang Chen<sup>3,\*</sup> MD, Chen Li<sup>2</sup> MD, Lijun Tan<sup>2</sup>,  
5 MD, Wencheng Zhang<sup>2</sup>, MD, Jiahua Lv<sup>1</sup>, MD, Xiqing Li<sup>3</sup>, MD, Miyong Xiao<sup>1</sup>, PhD, Yu Lin<sup>3</sup>,  
6 MD, Jinyi Lang<sup>1,#</sup>, MD, PhD, Tao Li<sup>1,#</sup>, MD and Zefen Xiao<sup>2,#</sup>, MD

7 <sup>1</sup> Department of Radiation Oncology, Sichuan Cancer Hospital & Institution, Sichuan Cancer  
8 Center, School of Medicine, University of Electronic Science and Technology of China,  
9 Radiation oncology Key Laboratory of Sichuan Province, Chengdu, 610041, China.

10 <sup>2</sup> Department of Radiation Oncology, National Cancer Center/Cancer Hospital, Chinese  
11 Academy of Medical Sciences and Peking Union Medical College, Beijing, 100021, China.

12 <sup>3</sup> Department of Radiation Oncology, Fujian Cancer Hospital & Fujian Medical University  
13 Cancer Hospital, Fuzhou, 350014, China.

14 \* Three authors contribute equally to the work.

15 **#Corresponding author:**

16 Zefen Xiao, MD, Department of Radiation Oncology, National Cancer Center/Cancer  
17 Hospital, Chinese Academy of Medical Sciences and Peking Union Medical College, Beijing,  
18 China. E-mail: [xiaozefen2013@163.com](mailto:xiaozefen2013@163.com)

19 Tao Li, MD, Department of Radiation Oncology, Sichuan Cancer Hospital & Institution,  
20 Sichuan Cancer Center, School of Medicine, University of Electronic Science and  
21 Technology of China, Chengdu, China. E-mail: [litaoxmf@126.com](mailto:litaoxmf@126.com)

22

## 23 SUPPLEMENTARY METHODS AND DATA

### 24 **Sichuan dataset**

25 All patients underwent CT simulation in the supine position using a slice thickness of 3 mm.

26 All simulator CT studies in our center were performed with a 16 detector row CT scanner

27 (PHILIPS Healthcare) and the same clinical protocol: 120 kV, 180-280 mA with tube current

28 modulation, a matrix of 512, a field of view of 500 mm, and 3mm reconstructed section

29 thicknesses after intravenous injection of 60-120 ml of 370 mg/ml (1.5ml/Kg) iodinated

30 contrast agent at 1.8-2 mL/sec. The gross tumor volume (GTV) was contoured according to

31 previous clinical imaging results, such as esophageal radiography, enhanced computed

32 tomography (CT), esophagoscopy, and positron emission tomography–computed tomography

33 (PET-CT). The clinical target volume (CTV) was defined as the GTV plus a 2–3-cm margin

34 in the craniocaudal direction and a 0.5-cm margin in the transverse plane, but not intruding

35 on any anatomical barriers (e.g., blood vessels). The patients were randomized to receive

36 either elective nodal irradiation (ENI) or involved field irradiation (IFI), with the CTV<sub>n</sub> of

37 the ENI group including any involved lymph node regions and clinically uninvolved lymph

38 node stations, based on the primary tumor’s location. Lymph node station numbers 1/2/4/5/7,

39 2/4/5/7, and 4/5/7/16/17 were included for upper thoracic, middle thoracic, and lower

40 thoracic ESCC in the ENI arm. The CTV of the IFI group included any clinically involved

41 lymph node regions. The irradiation doses were 60–66 Gy to the target lesion and metastatic

42 nodes and 50.4–54 Gy for the CTV.

### 43 ***Chemotherapy regimen and outcomes***

44 The chemotherapy regimen included docetaxel (60–80 mg/m<sup>2</sup> on day 1) and cisplatin (25

45 mg/m<sup>2</sup> on days 1–3) administered in two 3-week cycles. The Sichuan dataset included 83  
46 patients with stage IIB–III disease who were treated during 2012–2016. The median  
47 follow-up time was 40.1 months (range: 12.4–81.2 months), the median OS was 36.7 months,  
48 and the median PFS was 24.0 months. The 1-year, 3-year, and 5-year OS rates were 86.7%,  
49 50.9%, and 28.3%, respectively. The 1-year, 3-year, and 5-year PFS rates were 66.2%, 32.6%,  
50 and 25.4%, respectively. There were no significant differences in OS and PFS between the  
51 ENI group (n=41) and the INI group (n=42).

## 52 **Fujian dataset**

53 All patients underwent CT simulation and three-dimensional images were reconstructed using  
54 the treatment planning system. The GTV was contoured according to previous clinical  
55 imaging results, such as esophageal radiography, enhanced CT, esophagoscopy, and PET-CT.  
56 The CTV was defined as the GTV plus a 2–3-cm margin in the craniocaudal direction and a  
57 0.5-cm margin in the transverse plane, but not intruding on any anatomical barriers (e.g.,  
58 blood vessels). For cervical and upper thoracic tumors, the CTVn included several lymphatic  
59 drainage areas (cervical, para-esophageal, and supraclavicular) and station numbers 2/3/4/7.  
60 For lower thoracic tumors, the CTVn included station 8 and several lymphatic drainage areas  
61 (peri-gastric and celiac axis). The median irradiation doses were 61.5 Gy (range: 50.0–67.7  
62 Gy; 2.0–2.1 Gy per fraction) for the GTV and 54.0 Gy (range: 45–55.8 Gy; 1.8 Gy per  
63 fraction) for the CTV. Intensity-modulated radiotherapy was started 1 day after the first cycle  
64 of chemotherapy and administered 5 days/week for 5–6.6 weeks.

## 65 ***Chemotherapy regimen and outcomes***

66 The chemotherapy regimen included docetaxel (135 mg/m<sup>2</sup> on day 1) and cisplatin (25 mg/m<sup>2</sup>

67 on days 1–3) for two 3-week cycles. The median OS was 23.3 months and the 1-year, 3-year,  
68 and 5-year OS rates were 74.5%, 36.3%, and 18.2%, respectively. The median PFS was 10.4  
69 months and the 1-year, 3-year, and 5-year PFS rates were 43.8%, 17.6%, and 8.2%,  
70 respectively.

71

## 72 **Beijing dataset**

73 The radiotherapy and chemotherapy plans were the same as for the Fujian dataset. The  
74 Beijing study included 330 patients during 2004–2014, although 47 patients were excluded  
75 from the present study because their pre-treatment primary CT images could not be retrieved.  
76 The median follow-up time was 42.3 months (range: 9.8–83.9 months), the median OS was  
77 20.5 months, and the median PFS was 11.5 months. The 1-year, 3-year, and 5-year OS rates  
78 were 65.2%, 31.2%, and 18.7%, respectively. The 1-year, 3-year, and 5-year PFS rates were  
79 49.3%, 23.6%, and 12.8%, respectively. Relative to patients who received RT, patients who  
80 received CCRT had better OS (18.8 months vs. 27.5 months,  $P=0.003$ ) and better PFS (10.5  
81 months vs. 15.1 months,  $P=0.092$ ).

82 During that study, 49 patients underwent pretreatment using CCRT, although 5 patients were  
83 excluded from the present study because of loss to follow-up ( $n=1$ ) or death before surgery  
84 ( $n=4$ ). Among the remaining 44 patients, the median follow-up time was 42.3 months (range:  
85 9.8–83.9 months), the median OS was not achieved, and the median PFS was 40.8 months.  
86 The 1-year, 3-year, and 5-year OS rates were 90.7%, 63.7%, and 55.8%, respectively. The  
87 1-year, 3-year, and 5-year PFS rates were 79.1%, 61.3%, and 44.9%, respectively. Relative to  
88 patients without a pathological complete response, patients with a pathological complete

89 response had better median OS (26.5 months vs. not achieved,  $P=0.002$ ) and better median  
90 PFS (15.3 months vs. 40.8 months,  $P=0.004$ ).

91

## 92 **CT image acquisition and compactness measurement**

93 To evaluate the stability of the volume, surface area, and compactness measurements, 20  
94 patients were randomly selected for GTV contouring by 4 different oncologists at two  
95 treatment centers. These data did not provide information regarding prognosis, although  
96 compactness generally provided greater stability and less delineation inaccuracy than tumor  
97 volume and surface area (compactness: Friedman chi-square = 4.56,  $P=0.207$ ; surface area:  
98 Friedman chi-square = 22.14,  $P<0.001$ ; volume: Friedman chi-square = 8.88,  $P=0.03$ ).

99

100

101 **Table S1: Cox regression analyses of progression-free and overall survivals in Fujian**  
 102 **and Beijing dataset**

|                        | Progression-free survival |         | Overall survival  |         |
|------------------------|---------------------------|---------|-------------------|---------|
|                        | HR (95% CI)               | P-value | HR (95% CI)       | P-value |
| <b>Fujian data set</b> |                           |         |                   |         |
| Age                    |                           |         |                   |         |
| <65 years              | 1                         |         | 1                 |         |
| ≥65 years              | 0.91 (0.56–1.5)           | 0.722   | 0.81 (0.47–1.41)  | 0.462   |
| Sex                    |                           |         |                   |         |
| Male                   | 1                         |         | 1                 |         |
| Female                 | 0.66 (0.37–1.21)          | 0.179   | 0.76 (0.38–1.49)  | 0.424   |
| KPS                    |                           |         |                   |         |
| 90                     | 1                         |         | 1                 |         |
| 80                     | 0.66 (0.4–1.11)           | 0.118   | 0.87 (0.52–1.46)  | 0.594   |
| 70                     | 0.63 (0.11–3.62)          | 0.607   | 4.71 (0.73–30.46) | 0.104   |
| Location               |                           |         |                   |         |
| Cervical               | 1                         |         | 1                 |         |
| Upper                  | 1.93 (0.72–5.18)          | 0.189   | 1.06 (0.36–3.06)  | 0.92    |
| Middle                 | 2.36 (0.92–6.04)          | 0.0746  | 1.46 (0.52–4.06)  | 0.469   |
| Lower                  | 3.53 (1.25–9.98)          | 0.0176  | 3.69 (1.2–11.39)  | 0.0229  |
| Length                 |                           |         |                   |         |
| <5 cm                  | 1                         |         | 1                 |         |
| ≥5 cm                  | 1.18 (0.69–2.01)          | 0.542   | 1.44 (0.81–2.55)  | 0.215   |

TNM sixth edition

|     |                  |       |                  |       |
|-----|------------------|-------|------------------|-------|
| IIa | 1                |       | 1                |       |
| IIb | 1.02 (0.2–5.06)  | 0.983 | 0.34 (0.03–3.73) | 0.376 |
| III | 0.87 (0.34–2.18) | 0.759 | 2.34 (0.59–9.2)  | 0.225 |
| IVa | 0.87 (0.32–2.4)  | 0.794 | 2.8 (0.66–11.8)  | 0.162 |
| IVb | 0.85 (0.25–2.94) | 0.799 | 2.83 (0.58–13.9) | 0.2   |

Compactness

|               |                  |        |                  |       |
|---------------|------------------|--------|------------------|-------|
| Low risk      | 1                |        | 1                |       |
| Moderate risk | 1.46 (0.74–2.86) | 0.275  | 1.82 (0.88–3.75) | 0.104 |
| High risk     | 2.05 (1–4.21)    | 0.0489 | 1.69 (0.78–3.67) | 0.184 |

**Beijing data set**

Age

|           |                  |        |                  |       |
|-----------|------------------|--------|------------------|-------|
| <65 years | 1                |        | 1                |       |
| ≥65 years | 0.73 (0.55–0.96) | 0.0238 | 0.79 (0.59–1.06) | 0.117 |

Sex

|        |                |      |                  |       |
|--------|----------------|------|------------------|-------|
| Male   | 1              |      | 1                |       |
| Female | 0.9 (0.62–1.3) | 0.58 | 0.73 (0.49–1.09) | 0.128 |

KPS

|    |                  |       |                  |       |
|----|------------------|-------|------------------|-------|
| 90 | 1                |       | 1                |       |
| 80 | 0.97 (0.69–1.35) | 0.839 | 0.92 (0.64–1.31) | 0.629 |
| 70 | 1.43 (0.91–2.26) | 0.118 | 1.35 (0.84–2.18) | 0.209 |

|                   |                   |         |                   |          |
|-------------------|-------------------|---------|-------------------|----------|
| Location          |                   |         |                   |          |
| Cervical          | 1                 |         | 1                 |          |
| Upper             | 0.86 (0.47–1.59)  | 0.638   | 0.59 (0.32–1.11)  | 0.103    |
| Middle            | 0.8 (0.44–1.48)   | 0.485   | 0.54 (0.29–1.02)  | 0.0564   |
| Lower             | 1.23 (0.62–2.43)  | 0.549   | 0.91 (0.45–1.8)   | 0.777    |
| Length            |                   |         |                   |          |
| <5 cm             | 1                 |         | 1                 |          |
| ≥5 cm             | 0.96 (0.69–1.33)  | 0.798   | 1.15 (0.81–1.64)  | 0.442    |
| TNM sixth edition |                   |         |                   |          |
| I                 | 1                 |         | 1                 |          |
| IIa               | 2.3 (0.64–8.27)   | 0.203   | 2.87 (0.63–12.96) | 0.171    |
| III               | 3.14 (0.93–10.63) | 0.066   | 4.09 (0.96–17.5)  | 0.0576   |
| IVa               | 3.76 (1.07–13.19) | 0.0387  | 5.38 (1.21–23.96) | 0.0273   |
| IVb               | 4.26 (1.22–14.93) | 0.0235  | 4.91 (1.11–21.73) | 0.0359   |
| CCRT              |                   |         |                   |          |
| No                | 1                 |         | 1                 |          |
| Yes               | 0.59 (0.41–0.85)  | 0.00459 | 0.47 (0.31–0.69)  | 0.000153 |
| Compactness       |                   |         |                   |          |
| Low risk          | 1                 |         | 1                 |          |
| Moderate risk     | 1.21 (0.82–1.79)  | 0.33    | 1.22 (0.8–1.86)   | 0.347    |
| High risk         | 1.63 (1.09–2.44)  | 0.0168  | 1.64 (1.06–2.53)  | 0.0259   |



103 HR: hazard ratio, CI: confidence interval, KPS: Karnofsky Performance Score, CCRT:  
104 concurrent chemoradiotherapy.

105

106

107

108 **Table S2. Propensity score matching for patients who received radiotherapy alone or**  
 109 **concurrent chemoradiotherapy.**

|            |        | After matching |           |         | Raw dataset |            |         |
|------------|--------|----------------|-----------|---------|-------------|------------|---------|
|            |        | CCRT           | RT        | P-value | CCRT        | RT         | P-value |
| Sex        |        |                |           | 1       |             |            | 0.869   |
|            | Male   | 48 (85.7)      | 49 (87.5) |         | 48 (85.7)   | 190 (83.7) |         |
|            | Female | 8 (14.3)       | 7 (12.5)  |         | 8 (14.3)    | 37 (16.3)  |         |
| Age, years |        |                |           | 0.496*  |             |            | <0.001  |
|            | <60    | 39 (69.6)      | 35 (62.5) |         | 39 (69.6)   | 64 (28.2)  |         |
|            | 60–70  | 15 (26.8)      | 16 (28.6) |         | 15 (26.8)   | 71 (31.3)  |         |
|            | >70    | 2 (3.6)        | 5 (8.9)   |         | 2 (3.6)     | 92 (40.5)  |         |
| KPS        |        |                |           | 0.744*  |             |            | 0.008   |
|            | 90     | 21 (37.5)      | 17 (30.4) |         | 21 (37.5)   | 45 (19.8)  |         |
|            | 80     | 32 (57.1)      | 35 (62.5) |         | 32 (57.1)   | 148 (65.2) |         |
|            | 70     | 3 (5.4)        | 4 (7.1)   |         | 3 (5.4)     | 34 (15)    |         |
| TNM stage  |        |                |           | 1*      |             |            | 0.147*  |
|            | I      |                |           |         | 0 (0)       | 4 (1.8)    |         |
|            | IIA    | 1 (1.8)        | 2 (3.6)   |         | 1 (1.8)     | 23 (10.1)  |         |
|            | III    | 40 (71.4)      | 39 (69.6) |         | 40 (71.4)   | 139 (61.2) |         |
|            | IV     | 15 (26.8)      | 15 (26.8) |         | 15 (26.8)   | 61 (26.9)  |         |

110 \* P-values were calculated using Fisher's exact test.

111 CCRT: concurrent chemoradiotherapy, RT: radiotherapy alone, KPS: Karnofsky Performance

112 Score.

113

114 **Table S3. Benefit from concurrent chemoradiotherapy for 10 randomly selected pairs of**  
 115 **matched patients in each compactness risk group.**

| Pairing #                        | CCRT vs. RT  |                 |                      |                  |
|----------------------------------|--------------|-----------------|----------------------|------------------|
|                                  | All patients | Low compactness | Moderate compactness | High compactness |
| <b>Progression-free survival</b> |              |                 |                      |                  |
| 1                                | 0.006        | 0.459           | 0.249                | 0.015            |
| 2                                | 0.028        | 0.815           | 0.236                | 0.044            |
| 3                                | 0.185        | 0.457           | 0.907                | 0.043            |
| 4                                | 0.004        | 0.13            | 0.366                | 0.053            |
| 5                                | 0.138        | 0.808           | 0.665                | 0.127            |
| 6                                | 0.056        | 0.698           | 0.893                | 0.001            |
| 7                                | 0.059        | 0.677           | 0.495                | 0.032            |
| 8                                | 0.027        | 0.303           | 0.727                | 0.158            |
| 9                                | 0.019        | 0.555           | 0.07                 | 0.185            |
| 10                               | 0.004        | 0.308           | 0.28                 | 0.032            |
| <b>Overall survival</b>          |              |                 |                      |                  |
| 1                                | <0.001       | 0.313           | 0.031                | 0.001            |
| 2                                | <0.001       | 0.677           | 0.044                | 0.004            |
| 3                                | 0.01         | 0.42            | 0.346                | 0.001            |
| 4                                | <0.001       | 0.245           | 0.065                | 0.004            |
| 5                                | 0.005        | 0.963           | 0.202                | 0.008            |
| 6                                | 0.008        | 0.702           | 0.404                | <0.001           |
| 7                                | 0.001        | 0.383           | 0.11                 | 0.001            |
| 8                                | <0.001       | 0.123           | 0.252                | 0.011            |
| 9                                | <0.001       | 0.646           | 0.012                | 0.01             |
| 10                               | <0.001       | 0.167           | 0.048                | 0.001            |

116 The table shows the log-rank p-values for the comparison of CCRT vs. RT. Among the 10  
 117 randomly selected pairs, patients in the high-risk group experienced a PFS benefit from  
 118 CCRT in 6 groupings, although none of the patients in the low- and moderate-risk groups  
 119 experienced a PFS benefit. In addition, 10 patients in the high-risk group experienced an OS  
 120 benefit from CCRT, while none of the patients in the low- and moderate- risk groups  
 121 experienced an OS benefit.

122

123

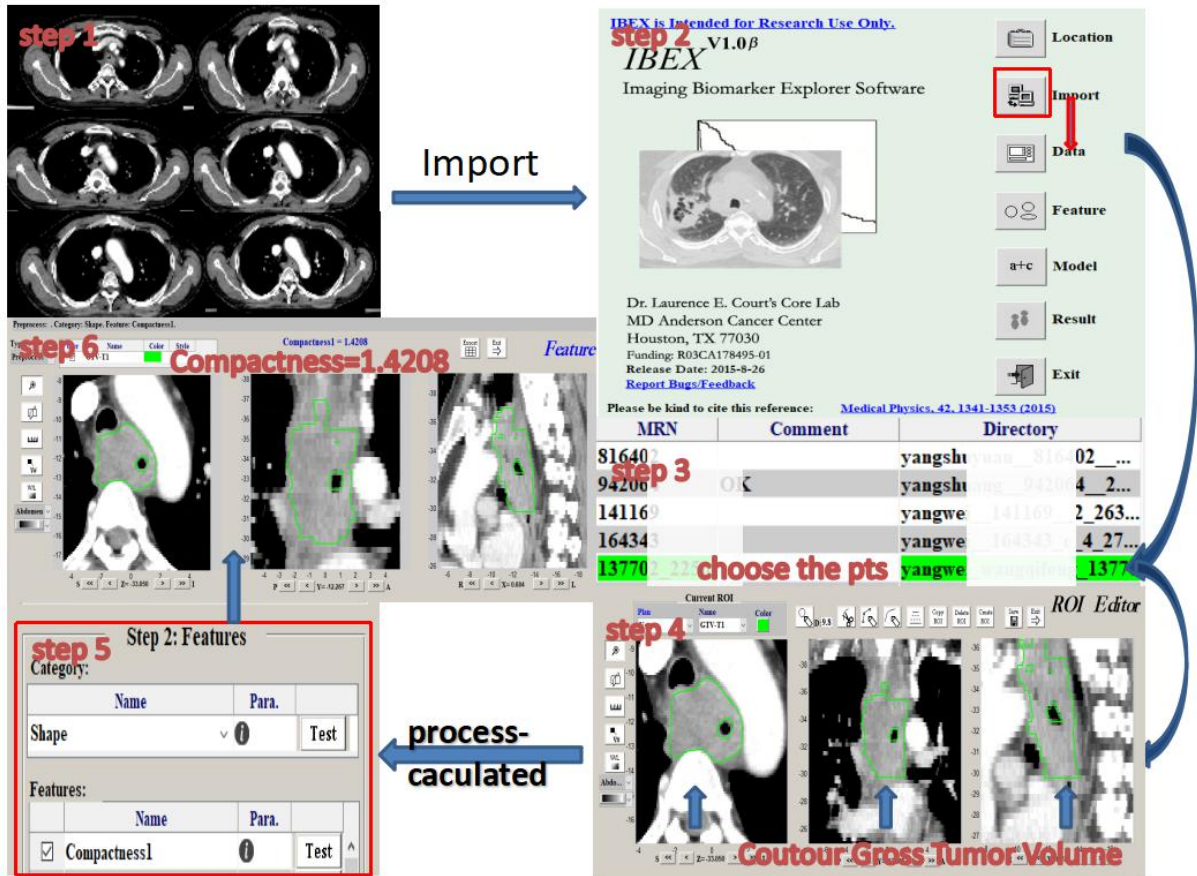

124

125 **Figure S1: Measuring compactness based on computed tomography images<sup>1-2</sup>.**

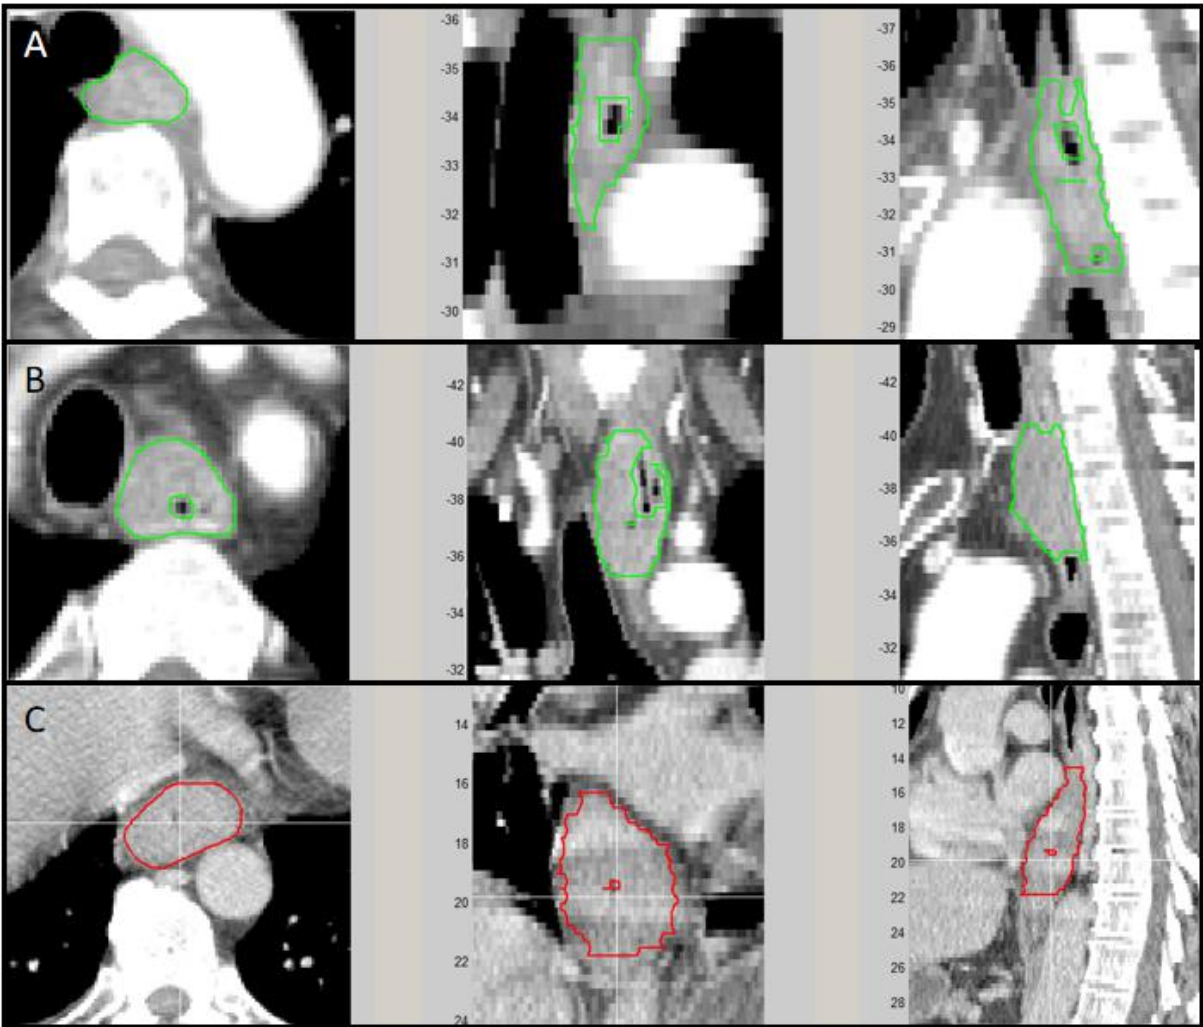

126

127 **Figure S2: CT image examples of low risk(patient A), medium risk(patient B) , and**

128 **high risk (patient C) for tumor compactness**

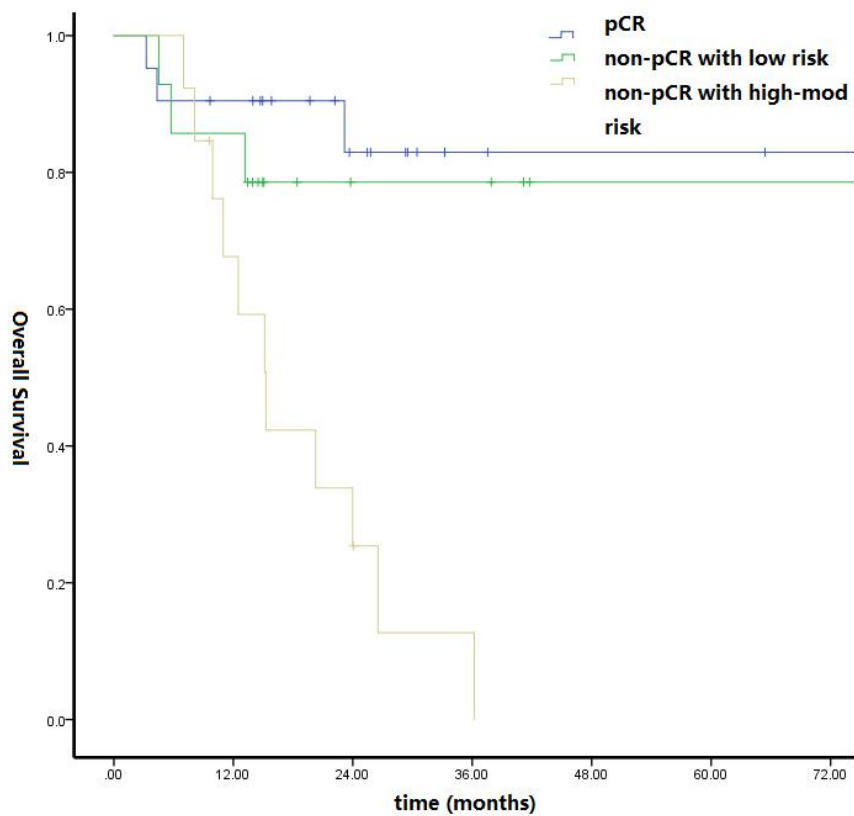

129

130 **Figure S3: Among patients who did not achieve a pathological complete response,**  
 131 **low-to-moderate compactness-based risk was associated with prolonged OS (P=0.009)**  
 132 **relative to the high-risk group.** The patients with low-to-moderate compactness-based risk  
 133 who did or did not have a pathological complete response had similar OS (P=0.127)

134

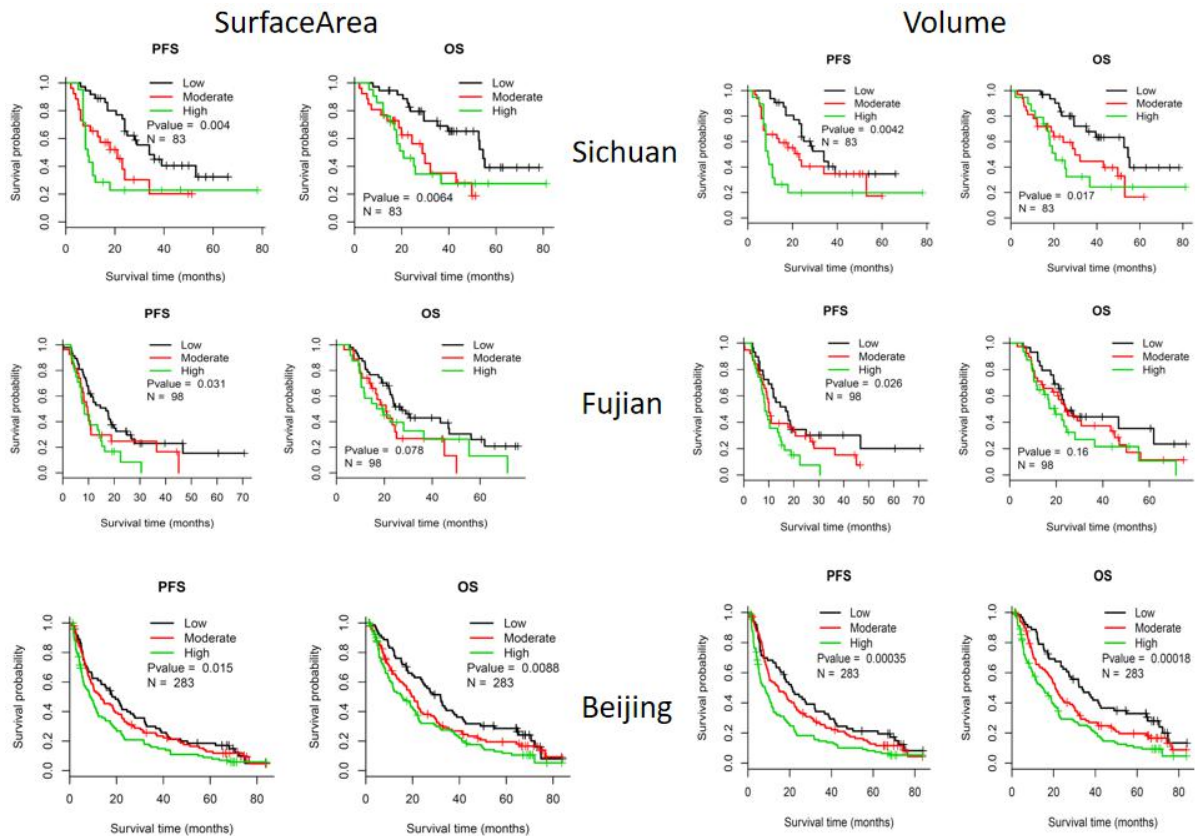

135 Surface and volume is not work in Fujian cohort

136 **Figure S4: Validating the prognostic values of volume and surface area in two**

137 **independent cohorts.** We were unable to validate the associations between volume, surface,  
 138 and overall survival in the Fujian dataset.

139 OS: overall survival, PFS: progression-free survival

140 **Reference**

141 1.Zhang L, et.al, Ibex: an open infrastructure software platform to facilitate collaborative  
 142 work in radiomics. Med Phys 2015;42(3):1341.

143 2. IBEX(2015): Imaging Biomarker Explorer Software V1.0 $\beta$ , URL:

144 <https://aapm.onlinelibrary.wiley.com/doi/abs/10.1118/1.4908210>
